# Supplementary material for: Changes in Hydroxyurea Use Among Youths Enrolled in Medicaid With Sickle Cell Anemia After 2014 Revision of Clinical Guidelines
Source: PubMed Central journal article supplement (PMC10313146; doi:10.1001/jamanetworkopen.2023.4584), 2023-03-24
Supplement: jamanetwopen-e234584-s001.pdf [file jamanetwopen-e234584-s001.pdf]

## Supplemental Online Content

Reeves SL, Peng HK, Wing JJ, et al. Changes in hydroxyurea use among youths enrolled in Medicaid with sickle cell anemia after 2014 revision of clinical guidelines. *JAMA Netw Open*. 2023;6(3):e234584. doi:10.1001/jamanetworkopen.2023.4584

**eTable 1.** Hydroxyurea Use Before and After Release of New Treatment Guidelines Among Youths With  $\geq 1$  Filled Hydroxyurea Prescription in the Year

**eTable 2.** Hydroxyurea Use Before and After Release of New Treatment Guidelines

**eTable 3.** Regression Results Estimating Filled Prescriptions

This supplemental material has been provided by the authors to give readers additional information about their work.

**eTable 1.** Hydroxyurea Use Before and After Release of New Treatment Guidelines Among Youths With  $\geq 1$  Filled Hydroxyurea Prescription in the Year

|                             | Michigan                                |                                          |                 | New York                                |                                          |                 |
|-----------------------------|-----------------------------------------|------------------------------------------|-----------------|-----------------------------------------|------------------------------------------|-----------------|
|                             | Pre-Release<br>(2010-2014)<br>(n = 352) | Post-Release<br>(2015-2018)<br>(n = 457) | <i>p</i> -value | Pre-Release<br>(2012-2014)<br>(n = 706) | Post-Release<br>(2015-2018)<br>(n = 692) | <i>p</i> -value |
| <b>Days' Supply</b>         |                                         |                                          |                 |                                         |                                          |                 |
| Minimum                     | 15                                      | 12                                       | --              | 0                                       | 1                                        | ---             |
| Quartile 1                  | 89                                      | 81                                       | --              | 114                                     | 130                                      | ---             |
| Median                      | 174                                     | 150                                      | --              | 228                                     | 256                                      | ---             |
| Quartile 3                  | 254.5                                   | 249                                      | --              | 324                                     | 365                                      | ---             |
| Maximum                     | 365                                     | 365                                      | --              | 365                                     | 365                                      | ----            |
| Mean (SD)                   | 174.53 (103.01)                         | 166.51 (103.89)                          | 0.22            | 215.27 (114.92)                         | 236.14 (119.35)                          | <0.001          |
| <b>Filled Prescriptions</b> |                                         |                                          |                 |                                         |                                          |                 |
| Minimum                     | 0                                       | 1                                        | --              | 1                                       | 1                                        | ---             |
| Quartile 1                  | 3                                       | 3                                        | --              | 4                                       | 4                                        | ---             |
| Median                      | 6                                       | 5                                        | --              | 8                                       | 8                                        | ---             |
| Quartile 3                  | 9                                       | 9                                        | --              | 11                                      | 11                                       | ---             |
| Maximum                     | 15                                      | 16                                       | --              | 27                                      | 27                                       | ---             |
| Mean (SD)                   | 6.08 (3.65)                             | 5.79 (3.66)                              | 0.25            | 7.29 (3.97)                             | 7.69 (4.34)                              | <0.001          |

**eTable 2.** Hydroxyurea Use Before and After Release of New Treatment Guidelines

|                             | Michigan                                 |                                           |                              | New York                                 |                                           |                 |
|-----------------------------|------------------------------------------|-------------------------------------------|------------------------------|------------------------------------------|-------------------------------------------|-----------------|
|                             | Pre-Release<br>(2010-2014)<br>(n = 1472) | Post-Release<br>(2015-2018)<br>(n = 1443) | <i>p</i> -value <sup>a</sup> | Pre-Release<br>(2012-2014)<br>(n = 3718) | Post-Release<br>(2015-2018)<br>(n = 5933) | <i>p</i> -value |
| <b>Filled Prescriptions</b> |                                          |                                           |                              |                                          |                                           |                 |
| Minimum                     | 0                                        | 0                                         | --                           | 0                                        | 0                                         | ---             |
| Quartile 1                  | 0                                        | 0                                         | --                           | 0                                        | 0                                         | ---             |
| Median                      | 0                                        | 0                                         | --                           | 0                                        | 0                                         | ---             |
| Quartile 3                  | 0                                        | 2                                         | --                           | 5                                        | 7                                         | ---             |
| Maximum                     | 15                                       | 16                                        | --                           | 27                                       | 27                                        | ---             |
| Mean (SD)                   | 1.45 (3.15)                              | 1.83 (3.39)                               | <0.001                       | 2.70 (4.27)                              | 3.53 (4.83)                               | <0.001          |

<sup>a</sup>Rankings were compared using Wilcoxon test

**eTable 3.** Regression Results Estimating Filled Prescriptions

|                                                                                         | <b>Michigan</b>                  | <b>New York State<sup>a</sup></b> |
|-----------------------------------------------------------------------------------------|----------------------------------|-----------------------------------|
|                                                                                         | Filled Prescriptions<br>(n=2915) | Filled Prescriptions<br>(n=4101)  |
|                                                                                         | Estimate<br>(95% CI)             | Estimate<br>(95% CI)              |
| <b>Logistic Component<br/>(Predicting Any vs None of Hydroxyurea Use Measures)</b>      |                                  |                                   |
| Years since 2010                                                                        | 0.00 (-0.07 to 0.07)             | N/A                               |
| Age                                                                                     | 0.09 (0.07 to -0.11)             | N/A                               |
| Post-guideline changes<br>(ref=pre-guideline changes)                                   | 0.43 (0.08 to 0.79)              | N/A                               |
| <b>Negative Binomial Component<br/>(Predicting Count of Hydroxyurea Use Measure)</b>    |                                  |                                   |
| Years since 2010                                                                        | -0.13 (-0.31 to 0.06)            | 0.16 (-0.15 to 0.47)              |
| (Years since 2010) <sup>2</sup>                                                         | 0.01 (-0.03 to 0.06)             | -0.02 (-0.17 to 0.13)             |
| Post-guideline changes<br>(ref=pre-guideline changes)                                   | -4.44 (-7.30 to -1.58)           | 0.16 (-0.92 to 1.24)              |
| Years since 2010 * post-guideline changes<br>(ref=pre-guideline changes)                | 1.38 (0.47 to 2.29)              | -0.10 (-0.68 to 0.49)             |
| (Years since 2010) <sup>2</sup> * post-guideline changes<br>(ref=pre-guideline changes) | -0.11 (-0.19 to -0.02)           | 0.02 (-0.14 to 0.18)              |
