# Supplementary material for: Changes in Hydroxyurea Use Among Youths Enrolled in Medicaid With Sickle Cell Anemia After 2014 Revision of Clinical Guidelines
Source: PubMed Central journal article supplement (PMC10313146; doi:10.1001/jamanetworkopen.2023.4584), 2023-03-24
Supplement: jamanetwopen-e234584-s002.pdf [file jamanetwopen-e234584-s002.pdf]

## **Data Sharing Statement**

Reeves. Changes in Hydroxyurea Use Among Youths Enrolled in Medicaid With Sickle Cell Anemia After 2014 Revision of Clinical Guidelines. *JAMA Netw Open*. Published online March 24, 2023. doi:10.1001/jamanetworkopen.2023.4584

## **Data**

**Data available:** No
